# Supplementary material for: Understanding the Impact of Electronic Medical Record Use on Practice-Based Population Health Management: A Mixed-Method Study
Source: PubMed Central journal article supplement (PMC4835667; doi:10.2196/medinform.4577), 2016-04-04
Supplement: medinform_v4i2e10_app2.pdf [file medinform_v4i2e10_app2.pdf]

## Multimedia Appendix 2. Time and completeness ratio of modules for each clinic

| Clinic  | Module 1   |     |            |              | Module 2   |     |            |              | Module 3   |     |            |              |
|---------|------------|-----|------------|--------------|------------|-----|------------|--------------|------------|-----|------------|--------------|
|         | Time (Min) | %   | confidence | preparedness | Time (Min) | %   | confidence | preparedness | Time (Min) | %   | confidence | preparedness |
| EMR_1   | 1          | 100 | 5          | N/C          | 48         | 100 | 4          | 0.94         | 50         | 100 | 4          | 1.2          |
| EMR_2   | 20         | 100 | 5          | 2.25         | 17         | 100 | 4          | 2.65         | 15         | 100 | 5          | 4            |
| EMR_3   | 1          | 100 | 3          | N/C          | 20         | 100 | 5          | 2.25         | 28         | 100 | 4          | 2.14         |
| EMR_4   | 40         | 100 | 1          | 0.47         | 35         | 100 | 5          | 1.29         | 57         | 100 | 4          | 0.51         |
| EMR_5   | 3          | 100 | 3          | N/C          | 48         | 100 | 1          | 0            | 30         | 100 | 5          | 1.2          |
| EMR_6   | 30         | 100 | 5          | 0.78         | 46         | 100 | 3          | 0.24         | 48         | 100 | 4          | 0.58         |
| EMR_7   | 83         | 10  | 3          | 0.28         | 64         | 100 | 3          | 0.62         | 58         | 100 | 3          | 0.62         |
| EMR_8   | 51         | 100 | 3          | 0.7          | 28         | 100 | 5          | 1.61         | 86         | 100 | 3          | 0.68         |
| Paper_1 | 44         | 10  | 2          | 0.1          | 40         | 10  | 2          | 0.11         | 44         | 10  | 2          | 0.14         |
| Paper_2 | 40         | 7   | 2          | 0.08         | 44         | 7   | 2          | 0.07         | 58         | 7   | 3          | 0.07         |
| Paper_3 | 32         | 4   | 1          | 0.06         | 24         | 4   | 1          | 0.08         | 32         | 4   | 1          | 0.02         |
| Clinic  | Module 4   |     |            |              | Module 5   |     |            |              | Module 6   |     |            |              |
|         | Time (Min) | %   | confidence | preparedness | Time (Min) | %   | confidence | preparedness | Time (Min) | %   | confidence | preparedness |
| EMR_1   | 19         | 100 | 5          | 2.37         | 60         | 100 | 4          | 1            | 24         | 100 | 5          | 1.88         |
| EMR_2   | 13         | 100 | 5          | 3.46         | 12         | 100 | 5          | 5            | 5          | 100 | 5          | 9            |
| EMR_3   | 15         | 100 | 5          | 3            | 40         | 100 | 4          | 1.5          | 0          | 100 | 5          | N/C          |
| EMR_4   | 13         | 100 | 5          | 3.46         | 13         | 100 | 5          | 4.62         | 0          | 100 | 5          | N/C          |
| EMR_5   | 34         | 100 | 5          | 1.32         | 29         | 100 | 2          | 2.07         | 6          | 100 | 2          | 7.5          |
| EMR_6   | 28         | 100 | 5          | 0.6          | 8          | 100 | 5          | 2.5          | 0          | 100 | 5          | N/C          |
| EMR_7   | 15         | 100 | 3          | 1.5          | 32         | 100 | 2          | 0.63         | 1          | 100 | 2          | N/C          |
| EMR_8   | 35         | 100 | 1          | 1.29         | 24         | 100 | 1          | 2.5          | 2          | 100 | 2          | N/C          |
| Paper_1 | 44         | 10  | 2          | 0.1          | 57         | 10  | 2          | 0.11         | 31         | 10  | 2          | 0.15         |
| Paper_2 | 45         | 7   | 3          | 0.07         | 64         | 7   | 2          | 0.07         | 46         | 7   | 2          | 0.07         |
| Paper_3 | 46         | 4   | 1          | 0.04         | 40         | 4   | 1          | 0.06         | 30         | 4   | 2          | 0.08         |

Note: All Confidence values are in a range of 1 to 5, where 1 is not confident and 5 is very confident that the information is actionable.

The preparedness score shows the capacity to conduct PBPH management.
